# Supplementary material for: The Effect of Feeding with Central European Local Mulberry Genotypes on the Development and Health Status of Silkworms and Quality Parameters of Raw Silk
Source: MDPI journal article supplement (doi:10.3390/insects13090836), 2022-09-14
Supplement: s1 [file s1]

Table S1. List of local Slovenian and Hungarian mulberry genotypes planted in the mulberry collection with location, geographic coordinates and detailed data, along with the list and specification of reference sericultural and fruit varieties.

| Identification No.  | region                | regionalization   | Abb. | location       | samp. date | Lat. (° N) | Long. (° E) | circ. (cm) |
|---------------------|-----------------------|-------------------|------|----------------|------------|------------|-------------|------------|
| Slovenian genotypes |                       |                   |      |                |            |            |             |            |
| SE 5                | South-Eastern         | Bela krajina      | SE   | Breznik        | 6.7.2016   | 45.520700  | 15.159010   | 122        |
| SE 8                | South-Eastern         | Bela krajina      | SE   | Marindol       | 6.7.2016   | 45.506450  | 15.329100   | 94         |
| SM 6                | Submediterranean      | Ajdovščina        | SM   | Črnič          | 11.2.2016  | 45.904970  | 13.780760   | 250        |
| SM 101.1            | Submediterranean r    | Kras              | SM   | Famlje         | 22.2.2016  | 45.660898  | 14.006956   | 189        |
| SM 137              | Submediterranean      | Kopraska brda     | SM   | Sečovlje       | 22.2.2016  | 45.465650  | 13.646830   | 237        |
| SM 214              | Submediterranean      | Goriška brda      | SM   | Medana         | 4.7.2016   | 45.982020  | 13.519870   | 120        |
| SP 12               | Subpannonean          | Slovenske gorice  | SP   | Benedikt       | 20.7.2016  | 46.614460  | 15.887180   | 281        |
| SP 256              | Subpannonean          | Murska ravan      | SP   | Dobrovnik      | 26.7.2016  | 46.655350  | 16.354410   | 178        |
| SP 303              | Subpannonean          | Dravska ravan     | SP   | Prepolje       | 8.6.2017   | 46.445965  | 15.764567   | 340        |
| SP 304              | Subpannonean          | Dravska ravan     | SP   | Župečja vas    | 8.6.2017   | 46.375654  | 15.766740   | 267        |
| Hungarian genotypes |                       |                   |      |                |            |            |             |            |
| BA 2151             | Southern Transdanubia | Baranya           | BA   | Bogadmindszent | 14.6.2017  | 45.916110  | 18.054140   | 132        |
| BA 2225             | Southern Transdanubia | Baranya           | BA   | Pecsvarad      | 15.6.2017  | 46.134550  | 18.377724   | 290        |
| BE 1264.2           | Southern Great Plain  | Bekes             | BE   | Bekescsaba     | 5.7.2017   | 46.684300  | 21.087600   | 182        |
| GMS 2286            | Western Transdanubia  | Gyor-Moson-Sopron | GMS  | Bosarkany      | 20.6.2017  | 47.713730  | 17.223230   | 330        |
| GMS 2329            | Western Transdanubia  | Gyor-Moson-Sopron | GMS  | Lebeny         | 20.6.2017  | 47.737740  | 17.386580   | 270        |
| GMS 2532            | Western Transdanubia  | Gyor-Moson-Sopron | GMS  | Nagycent       | 20.6.2017  | 47.610360  | 16.672090   | 245        |
| GMS 2533            | Western Transdanubia  | Gyor-Moson-Sopron | GMS  | Nagycent       | 20.6.2017  | 47.610360  | 16.672090   | 225        |
| SO 1013             | Southern Transdanubia | Somogy            | SO   | Nagybajom      | 30.5.2017  | 46.395783  | 17.499668   | 2x70       |
| SO 1035             | Southern Transdanubia | Somogy            | SO   | Mernye         | 30.5.2017  | 46.516639  | 17.819101   | 2x65       |
| SO 1042             | Southern Transdanubia | Somogy            | SO   | Igal           | 30.5.2017  | 46.533231  | 17.939263   | 340        |
| TO 1131             | Southern Transdanubia | Tolna             | TO   | Sárszentlőrinc | 14.6.2017  | 46.664900  | 18.598900   | 483        |
| VE 2706             | Central Transdanubia  | Veszprem          | VE   | Tihany         | 27.6.2017  | 46.922300  | 17.824900   | 260        |
| ZA 1060             | Western Transdanubia  | Vas               | VA   | Bajánsenye     | 6.6.2017   | 46.807400  | 16.390300   | 172        |

|         |                      |      |    |                 |          |           |           |     |
|---------|----------------------|------|----|-----------------|----------|-----------|-----------|-----|
| ZA 1070 | Western Transdanubia | Vas  | VA | Csákánydoroszló | 6.6.2017 | 46.967800 | 16.470300 | 272 |
| ZA 2084 | Western Transdanubia | Zala | ZA | Kiliman - Gelse | 6.6.2017 | 46.628430 | 16.995460 | 60  |

1

| Reference sericultural varieties | origin               | obtained                                               | prop./planting date |
|----------------------------------|----------------------|--------------------------------------------------------|---------------------|
| <i>Morus alba</i> 'Florio'       | Italy                | mulberry gene bank CREA Padua, Italy                   | 3.2015              |
| <i>Morus alba</i> 'Giazzaola'    | Italy                | mulberry gene bank CREA Padua, Italy                   | 3.2015/             |
| <i>Morus alba</i> 'Kokusou'      | Japan                | mulberry gene bank CREA Padua, Italy                   | 3.2015              |
| <i>Morus alba</i> 'Morettiana'   | Italy                | mulberry gene bank CREA Padua, Italy                   | 3.2015              |
| Fruit varieties                  |                      |                                                        |                     |
| <i>M. alba</i> s.l. (Bulgaria)   | Bulgaria             | Hubmann, Austria (original from collector in Bulgaria) | 2014/3.2016         |
| <i>M. alba</i> × <i>rubra</i>    | hybrid               | Hubmann, Austria (original Graz, Leonhardstr.)         | 2014/3.2016         |
| <i>M. australis</i>              | unknown              | Hubmann, Austria (original from cornusmas.eu)          | 2014/3.2016         |
| <i>M. nigra</i>                  | East Styria, Austria | Pucher, Austria                                        | 2014/3.2016         |

2

Table S2. The mean concentrations of the total proteins, total phenolics and individual phenolics (mg/g DW) in leaves of Slovenian, Hungarian old mulberry genotypes, reference sericultural and fruit varieties. Among predominant phenolics, different letters (a–n) indicate significant differences ( $p < 0.05$ ), which were determined using the post hoc Duncan test.

| Genotype               |        |       | chlorogenic<br>a. | 4-<br>caffeoyl-<br>QA | 5-<br>caffeoyl-<br>l-QA | total<br>caffeoyl-<br>QA | p-<br>CAH   |             |           |      |           | tCQ<br>A | Q-<br>diR-<br>gly |                          |      |       |       | t Q-<br>gly | K-<br>diR |      |          | K-<br>ace-<br>tyl-<br>RH | t K<br>gly. * |      |      |
|------------------------|--------|-------|-------------------|-----------------------|-------------------------|--------------------------|-------------|-------------|-----------|------|-----------|----------|-------------------|--------------------------|------|-------|-------|-------------|-----------|------|----------|--------------------------|---------------|------|------|
| name                   | tProt. | tPH   |                   |                       |                         |                          | c-5-<br>CQA | t-5-<br>CQA | p-<br>CAH | 2    | p-<br>CQA |          | QM<br>H           | Q-<br>ac-<br>etyl-<br>RH | QAH  | KAH   | H     |             | KRH       |      |          |                          |               |      |      |
| Slovenian<br>genotypes |        |       |                   |                       |                         |                          |             |             |           |      |           |          |                   |                          |      |       |       |             |           |      |          |                          |               |      |      |
| SE 5                   | 222.14 | 19.35 | 11.73 ef          | 0.89 b-e              | 0.23 ab                 | 12.84                    | 1.09        | 0.92        | 0.24      | 0.78 | 0.08      | 3.11     | 3.16 b-d          | 0.34 d-g                 | 1.64 | 0.035 | 0.013 | 0.005       | 0.076     | 5.27 | 1.72 de  | 0.16                     | 0.62          | 0.03 | 2.53 |
| SE 8                   | 217.93 | 16.71 | 9.66 f-i          | 0.73 d-g              | 0.23 ab                 | 10.62                    | 1.71        | 0.97        | 0.23      | 1.81 | 0.20      | 4.92     | 1.94 j-l          | 0.24 j-m                 | 1.57 | 0.051 | 0.014 | 0.002       | 0.077     | 3.89 | 2.16 g-k | 0.28                     | 0.39          | 0.06 | 2.89 |
| SM 6                   | 182.65 | 11.26 | 5.10 f-i          | 0.41 b-e              | 0.15 ab                 | 5.66                     | 0.45        | 0.31        | 0.19      | 0.74 | 0.09      | 1.78     | 2.62 b-e          | 0.33 d-g                 | 1.01 | 0.063 | 0.013 | 0.002       | 0.043     | 4.08 | 1.08 r   | 0.21                     | 0.45          | 0.05 | 1.80 |
| SM 101.1               | 239.42 | 17.54 | 8.44 g-i          | 1.06 b-e              | 0.22 ab                 | 9.73                     | 1.60        | 1.48        | 0.52      | 0.81 | 0.26      | 4.67     | 2.94 b-e          | 0.29 f-j                 | 1.93 | 0.134 | 0.028 | 0.004       | 0.094     | 5.42 | 2.04 h-l | 0.20                     | 0.48          | 0.11 | 2.84 |
| SM 137                 | 211.04 | 15.97 | 7.76 hi           | 0.74 d-g              | 0.23 ab                 | 8.73                     | 1.45        | 0.87        | 0.44      | 1.55 | 0.20      | 4.51     | 2.85 b-f          | 0.37 d                   | 1.31 | 0.131 | 0.050 | 0.003       | 0.068     | 4.78 | 2.17 g-j | 0.20                     | 0.82          | 0.14 | 3.33 |
| SM 214                 | 193.00 | 16.22 | 7.49 i            | 1.18 b-d              | 0.25 ab                 | 8.91                     | 1.30        | 0.94        | 0.76      | 1.48 | 0.22      | 4.70     | 1.34 mn           | 0.26 i-l                 | 1.01 | 0.090 | 0.024 | 0.001       | 0.056     | 2.78 | 1.45 o-r | 0.14                     | 0.28          | 0.13 | 1.99 |
| SP 12                  | 188.59 | 11.80 | 9.15 f-i          | 0.24 g                | 0.04 c                  | 9.43                     | 1.89        | 0.06        | 0.82      | 1.47 | 0.29      | 2.25     | 2.03 h-l          | 0.18 mn                  | 1.51 | 0.022 | 0.012 | 0.001       | 0.072     | 3.83 | 3.22 bc  | 0.22                     | 0.56          | 0.02 | 4.03 |
| SP 256                 | 186.99 | 18.53 | 8.79 f-i          | 0.79 c-f              | 0.20 ab                 | 9.78                     | 0.91        | 0.60        | 0.20      | 1.02 | 0.05      | 2.77     | 1.97 i-l          | 0.20 mn                  | 1.66 | 0.033 | 0.012 | 0.001       | 0.079     | 3.95 | 2.26 f-j | 0.16                     | 0.45          | 0.05 | 2.91 |
| SP 303                 | 229.61 | 17.41 | 10.42 e-i         | 0.89 b-e              | 0.23 ab                 | 11.53                    | 1.84        | 1.17        | 0.35      | 1.87 | 0.26      | 5.49     | 1.86 jm           | 0.28 h-k                 | 1.56 | 0.066 | 0.021 | 0.000       | 0.073     | 3.85 | 2.70 de  | 0.43                     | 0.49          | 0.09 | 3.71 |
| SP 304                 | 214.57 | 16.82 | 8.69 f-i          | 1.02 b-e              | 0.27 ab                 | 9.98                     | 1.67        | 0.92        | 0.90      | 1.44 | 0.19      | 5.12     | 2.30 g-j          | 0.22 k-n                 | 1.37 | 0.018 | 0.016 | 0.007       | 0.062     | 4.00 | 2.34 e-h | 0.10                     | 0.56          | 0.05 | 3.04 |
| Hungarian<br>genotypes |        |       |                   |                       |                         |                          |             |             |           |      |           |          |                   |                          |      |       |       |             |           |      |          |                          |               |      |      |
| BA 2151                | 202.78 | 16.75 | 7.12 f-i          | 1.07 b-e              | 0.36 ab                 | 8.55                     | 0.76        | 0.07        | 0.46      | 0.49 | 0.06      | 1.84     | 1.87 j-l          | 0.21 l-n                 | 0.91 | 0.084 | 0.017 | 0.001       | 0.041     | 3.13 | 1.02 r   | 0.03                     | 0.34          | 0.09 | 1.46 |
| BA 2225                | 209.72 | 17.08 | 5.93 f-i          | 1.22 b-e              | 0.25 ab                 | 7.41                     | 0.93        | 0.27        | 0.38      | 0.65 | 0.06      | 2.29     | 1.25 mn           | 0.05 n                   | 0.74 | 0.024 | 0.007 | 0.000       | 0.031     | 2.10 | 0.94 r   | 0.06                     | 0.22          | 0.04 | 1.25 |
| BE 1264.2              | 225.90 | 17.84 | 10.48 d-i         | 0.94 b-e              | 0.25 ab                 | 11.66                    | 1.80        | 1.38        | 0.58      | 1.96 | 0.39      | 6.10     | 3.10 b-d          | 0.29 g-j                 | 2.08 | 0.023 | 0.010 | 0.000       | 0.107     | 5.61 | 3.17 bc  | 0.24                     | 0.76          | 0.05 | 4.22 |
| GMS 2286               | 215.79 | 17.58 | 9.09 f-i          | 1.05 b-e              | 0.28 ab                 | 10.42                    | 1.58        | 0.93        | 0.53      | 2.09 | 0.16      | 5.28     | 2.93 b-e          | 0.35 de                  | 1.48 | 0.086 | 0.022 | 0.004       | 0.073     | 4.94 | 1.89 j-n | 0.05                     | 0.66          | 0.07 | 2.66 |
| GMS 2329               | 219.85 | 17.16 | 11.09 d-g         | 0.92 b-e              | 0.23 ab                 | 12.24                    | 1.96        | 0.98        | 0.47      | 1.69 | 0.13      | 5.23     | 2.31 e-i          | 0.30 e-i                 | 1.78 | 0.020 | 0.010 | 0.004       | 0.479     | 4.89 | 1.93 i-l | 0.38                     | 0.47          | 0.04 | 2.82 |
| GMS 2532               | 210.49 | 18.81 | 10.00 f-i         | 1.26 bc               | 0.21ab                  | 11.46                    | 1.06        | 0.31        | 0.57      | 0.62 | 0.08      | 2.63     | 3.06 b-d          | 0.19 mn                  | 0.99 | 0.024 | 0.014 | 0.002       | 0.048     | 4.32 | 1.56 m-r | 0.46                     | 0.75          | 0.03 | 2.80 |
| GMS 2533               | 178.81 | 17.88 | 9.17 f-i          | 1.22 b-d              | 0.21 ab                 | 10.60                    | 0.97        | 0.27        | 0.64      | 0.73 | 0.09      | 2.70     | 2.68 c-g          | 0.17 n                   | 0.87 | 0.023 | 0.012 | 0.002       | 0.041     | 3.79 | 1.33 r   | 0.47                     | 0.65          | 0.03 | 2.48 |
| SO 1013                | 221.89 | 16.95 | 9.63 f-i          | 0.92 b-e              | 0.24ab                  | 10.79                    | 1.80        | 0.67        | 0.44      | 2.04 | 0.15      | 5.10     | 2.38 f-j          | 0.22 l-n                 | 1.26 | 0.057 | 0.015 | 0.002       | 0.061     | 4.00 | 1.78 k-o | 0.06                     | 0.57          | 0.06 | 2.48 |
| SO 1035                | 220.60 | 18.62 | 13.52 cd          | 0.79 c-f              | 0.26 ab                 | 14.56                    | 2.33        | 1.20        | 0.42      | 1.46 | 0.36      | 5.77     | 2.31 g-j          | 0.31 d-i                 | 1.96 | 0.080 | 0.027 | 0.003       | 0.093     | 4.78 | 3.26 b   | 0.31                     | 0.62          | 0.13 | 4.32 |
| SO 1042                | 213.87 | 18.21 | 4.00 f-i          | 0.61 b-e              | 0.26 ab                 | 4.87                     | 0.56        | 0.29        | 0.23      | 0.77 | 0.04      | 1.89     | 1.96 j-l          | 0.20 l-n                 | 1.18 | 0.019 | 0.010 | 0.000       | 0.056     | 3.42 | 1.30 r   | 0.05                     | 0.34          | 0.03 | 1.72 |
| TO 1013                | 214.70 | 19.21 | 7.79 f-i          | 1.35 f-g              | 0.27 c                  | 9.40                     | 0.82        | 0.16        | 0.55      | 0.65 | 0.08      | 2.26     | 3.35 a            | 0.21 de                  | 0.74 | 0.041 | 0.013 | 0.002       | 0.041     | 4.40 | 0.99 h-l | 0.21                     | 0.65          | 0.03 | 1.87 |
| TO 1131                | 212.70 | 18.87 | 10.66 d-h         | 1.37 b                | 0.24 ab                 | 12.27                    | 2.00        | 0.57        | 0.74      | 1.78 | 0.40      | 5.49     | 4.31 a            | 0.37 d                   | 1.39 | 0.026 | 0.008 | 0.003       | 0.078     | 6.18 | 2.27 f-i | 0.50                     | 1.22          | 0.03 | 4.02 |
| VE 2706                | 196.71 | 19.04 | 8.80 f-i          | 0.66 e-g              | 0.24 ab                 | 9.71                     | 0.87        | 0.91        | 0.49      | 0.92 | 0.18      | 3.37     | 2.70 b-g          | 0.36 d                   | 2.05 | 0.092 | 0.034 | 0.003       | 0.103     | 5.34 | 2.87 cd  | 0.03                     | 0.71          | 0.08 | 3.69 |
| ZA 1060                | 226.89 | 19.33 | 11.27 d-g         | 0.64 e-g              | 0.22 ab                 | 12.12                    | 1.08        | 0.77        | 0.15      | 1.13 | 0.21      | 3.34     | 2.48 e-i          | 0.45 c                   | 2.03 | 0.119 | 0.035 | 0.001       | 0.092     | 5.21 | 2.71 de  | 0.04                     | 0.46          | 0.21 | 3.42 |

|                                  |        |       |           |          |         |       |      |      |      |      |      |       |          |          |      |       |       |       |       |      |          |      |      |      |      |
|----------------------------------|--------|-------|-----------|----------|---------|-------|------|------|------|------|------|-------|----------|----------|------|-------|-------|-------|-------|------|----------|------|------|------|------|
| ZA 1070                          | 210.18 | 21.03 | 10.48 d-i | 0.98 b-e | 0.19 b  | 11.64 | 1.08 | 0.64 | 0.29 | 1.10 | 0.07 | 3.17  | 3.18 bc  | 0.32 d-h | 1.88 | 0.037 | 0.014 | 0.004 | 0.092 | 5.53 | 1.53 n-r | 0.43 | 0.47 | 0.02 | 2.45 |
| ZA 2084                          | 202.88 | 18.11 | 7.80 hi   | 0.92 b-e | 0.22 ab | 8.94  | 1.19 | 1.00 | 0.56 | 1.61 | 0.16 | 4.51  | 1.91 j-l | 0.26 i-l | 1.56 | 0.066 | 0.022 | 0.003 | 0.084 | 3.90 | 2.62 df  | 0.22 | 0.44 | 0.09 | 3.37 |
| Ref. var.                        |        |       |           |          |         |       |      |      |      |      |      |       |          |          |      |       |       |       |       |      |          |      |      |      |      |
| Florio'                          | 197.92 | 20.54 | 13.27 c-e | 1.23 bd  | 0.23 ab | 14.73 | 1.13 | 0.53 | 0.54 | 1.14 | 0.12 | 3.47  | 3.10 b-d | 0.29 g-j | 1.83 | 0.040 | 0.015 | 0.002 | 0.082 | 5.36 | 2.51 d-g | 0.60 | 0.70 | 0.05 | 3.86 |
| Giazzola'                        | 178.72 | 19.15 | 8.49 g-i  | 1.08 b-e | 0.21 ab | 9.77  | 0.90 | 0.28 | 0.56 | 0.65 | 0.10 | 2.49  | 2.64 dh  | 0.24 j-n | 0.88 | 0.441 | 0.020 | 0.004 | 0.041 | 4.26 | 1.28 r   | 0.15 | 0.60 | 0.07 | 2.10 |
| Kokusou'                         | 205.92 | 21.36 | 17.67 ab  | 0.89 b-e | 0.21 ab | 18.77 | 1.68 | 0.77 | 0.19 | 1.05 | 0.14 | 3.82  | 4.10 a   | 0.54 b   | 2.25 | 0.023 | 0.008 | 0.001 | 0.097 | 7.02 | 3.20 bc  | 0.10 | 1.07 | 0.02 | 4.38 |
| Morettiana'                      | 182.94 | 18.75 | 7.44 i    | 0.93 b-e | 0.21 ab | 8.58  | 0.78 | 0.67 | 0.75 | 1.33 | 0.08 | 3.61  | 3.22 b   | 0.52 b   | 1.56 | 0.250 | 0.039 | 0.001 | 0.089 | 5.68 | 1.35 pr  | 0.33 | 0.45 | 0.10 | 2.23 |
| Fruit var.                       |        |       |           |          |         |       |      |      |      |      |      |       |          |          |      |       |       |       |       |      |          |      |      |      |      |
| <i>M. alba</i><br>(Bulgaria)     | 151.50 | 19.62 | 10.60 d-h | 0.99 b-e | 0.19 ab | 11.78 | 1.16 | 0.22 | 0.23 | 0.38 | 0.41 | 2.40  | 1.07 n   | 0.17 n   | 1.00 | 0.046 | 0.016 | 0.001 | 0.046 | 2.35 | 1.97 h-l | 0.43 | 0.36 | 0.10 | 2.86 |
| <i>M. alba</i> ×<br><i>rubra</i> | 203.84 | 21.51 | 14.90 bc  | 4.36 a   | 0.28 a  | 19.54 | 0.78 | 2.41 | 2.03 | 1.76 | 0.41 | 7.39  | 1.67 km  | 0.74 a   | 1.54 | 0.161 | 0.082 | 0.001 | 0.088 | 4.28 | 4.42 a   | 0.48 | 0.79 | 0.59 | 6.27 |
| <i>M. australis</i>              | 179.51 | 17.48 | 8.71 f-i  | 1.37 b   | 0.20 ab | 10.27 | 0.93 | 0.42 | 0.92 | 1.02 | 0.20 | 3.49  | 1.58 ln  | 0.20 mn  | 1.08 | 0.031 | 0.018 | 0.001 | 0.069 | 2.98 | 1.73 l-p | 0.46 | 0.34 | 0.08 | 2.60 |
| <i>M. nigra</i>                  | 200.93 | 20.26 | 18.05 a   | 1.26 bc  | 0.24 ab | 19.55 | 3.24 | 1.99 | 1.15 | 2.35 | 1.27 | 10.00 | 2.18 g-k | 0.35 df  | 1.30 | 0.057 | 0.018 | 0.002 | 0.054 | 3.96 | 1.27 r   | 0.21 | 0.34 | 0.03 | 1.84 |

\*Ref. var., reference sericultural varieties; Fruit var, fruit varieties; tProt, total protein; tPH, total phenolics; 4-caffeoyl-QA, 4-caffeoylquinic acid; 5-caffeoyl-QA, 5-caffeoylquinic acid; 5-total CQA, total caffeoylquinic acid derivatives; c-5-CQA, c-5-coumaroylquinic acid; t-5-CQA, t-5-coumaroylquinic acid; p-CAH, p-coumaric acid hexoside; p-CAH2, p-coumaric acid hexoside 2; p-CQA, p-coumaroylquinic acid; total CQA, total coumaroylquinic acid derivatives; Q-3-glu, quercetin-3-glucoside; QMH, quercetin malonyl-hexoside; Q-diR-gly, quercetin dirhamnosyl-glycoside; QRH, quercetin rhamnosyl-hexoside; Q-acetyl-RH, quercetin acetyl-rhamnosyl hexoside; QAH, quercetin acetyl hexoside; total Q-gly, total quercetin glycoside derivatives; KAH, kaemph acetyl-hexoside; K-diRH, kaempheroldirhamnosyl-hexoside; KRH, kaempherol rhamnosyl-hexoside; K-acetyl-RH, kaempherol acetyl-rhamnosyl-hexoside; t K gly, total kaempherol-glycoside derivatives

Table S3. The mean concentrations of the macro- and micronutrients in leaves of Slovenian, and Hungarian old mulberry genotypes, reference sericultural and fruit varieties.

| Genotype name                    | P    | S    | K     | Ca    | Cl   | Mn   | Fe  | Ni   | Zn   | Rb   | Sr   |
|----------------------------------|------|------|-------|-------|------|------|-----|------|------|------|------|
| Slovenian mulberry genotypes     |      |      |       |       |      |      |     |      |      |      |      |
| SE 5                             | 2.04 | 0.79 | 16.20 | 14.40 | 1110 | 57.8 | 141 | 21.5 | 18.5 | 16.9 | 54   |
| SE 8                             | 1.79 | 0.91 | 17.30 | 16.90 | 922  | 64.5 | 136 | 17.1 | 23.8 | 19.5 | 61.1 |
| SM 6                             | 1.54 | 0.60 | 12.60 | 17.90 | 774  | 71.5 | 149 | 27.1 | 33.7 | 31.7 | 72   |
| SM 101.1                         | 1.47 | 0.94 | 13.80 | 11.60 | 543  | 70   | 136 | 18.7 | 16.9 | 51.7 | 54.9 |
| SM 137                           | 1.61 | 0.76 | 16.90 | 19.80 | 1040 | 73.8 | 146 | 35.6 | 20.9 | 15.8 | 87.4 |
| SM 214                           | 1.57 | 1.13 | 15.50 | 16.50 | 897  | 49   | 127 | 19   | 11.4 | 29.6 | 37.8 |
| SP 12                            | 1.32 | 0.86 | 13.60 | 13.20 | 665  | 64.9 | 120 | 15.8 | 18.4 | 13.8 | 57.1 |
| SP 256                           | 1.85 | 0.91 | 18.10 | 16.30 | 1040 | 85.5 | 141 | 24.7 | 23.8 | 46.7 | 71.7 |
| SP 303                           | 1.41 | 0.97 | 14.70 | 10.80 | 850  | 59.6 | 156 | 18.8 | 26.3 | 28   | 42.8 |
| SP 304                           | 1.25 | 1.04 | 14.30 | 19.50 | 872  | 83.1 | 133 | 20.7 | 14   | 27.6 | 71.8 |
| Hungarian mulberry genotypes     |      |      |       |       |      |      |     |      |      |      |      |
| BA 2151                          | 1.40 | 0.88 | 20.12 | 10.32 | 765  | 95   | 170 | 23   | 30   | 35   | 74.9 |
| BA 2225                          | 1.50 | 0.89 | 22.10 | 11.20 | 818  | 105  | 172 | 24.9 | 31.5 | 39.1 | 75.9 |
| BE 1264.2                        | 1.65 | 0.98 | 18.40 | 14.10 | 1320 | 62   | 115 | 26.3 | 25.5 | 23   | 51.4 |
| GMS 2286                         | 1.56 | 0.93 | 18.40 | 12.90 | 754  | 79   | 155 | 27.6 | 18.4 | 45.9 | 57.9 |
| GMS 2329                         | 1.35 | 0.79 | 15.60 | 12.30 | 838  | 82.1 | 145 | 19.5 | 20.8 | 36.9 | 80.6 |
| GMS 2532                         | 1.99 | 1.26 | 18.60 | 20.00 | 994  | 101  | 185 | 24.9 | 28   | 31.6 | 70.9 |
| GMS 2533                         | 1.51 | 1.09 | 13.50 | 19.20 | 840  | 97.2 | 204 | 35.5 | 19.1 | 22.7 | 152  |
| SO 1013                          | 1.59 | 0.77 | 16.40 | 14.60 | 925  | 51.4 | 101 | 19   | 17.5 | 12.7 | 46   |
| SO 1035                          | 1.46 | 0.66 | 17.80 | 8.63  | 609  | 56   | 132 | 17.8 | 16.9 | 27.3 | 22.8 |
| SO 1042                          | 1.54 | 0.92 | 14.50 | 13.40 | 820  | 89.5 | 178 | 21.2 | 22.4 | 36.4 | 80.4 |
| TO 1013                          | 1.59 | 0.77 | 16.40 | 14.60 | 925  | 51.4 | 101 | 19   | 17.5 | 12.7 | 46   |
| TO 1131                          | 1.61 | 0.80 | 16.90 | 9.41  | 660  | 47.9 | 106 | 13.5 | 21.1 | 23.8 | 34.4 |
| VE 2706                          | 1.64 | 0.86 | 14.80 | 15.70 | 1330 | 80.2 | 140 | 14.5 | 13.6 | 25.5 | 70.8 |
| ZA 1060                          | 1.64 | 1.04 | 16.50 | 11.30 | 1000 | 61   | 144 | 14.6 | 25.2 | 17   | 41.8 |
| ZA 1070                          | 1.76 | 0.94 | 15.90 | 13.60 | 816  | 71   | 142 | 17.9 | 21.6 | 35.1 | 66.6 |
| ZA 2084                          | 1.43 | 0.96 | 15.80 | 12.90 | 994  | 73.8 | 142 | 27.3 | 24   | 42.1 | 57.9 |
| Reference sericultural varieties |      |      |       |       |      |      |     |      |      |      |      |
| Florio'                          | 1.72 | 0.77 | 21.40 | 14.40 | 535  | 61.1 | 132 | 33.4 | 15.7 | 31.9 | 30.6 |
| Giazzola'                        | 1.33 | 0.78 | 11.20 | 16.10 | 1010 | 49.5 | 110 | 17.5 | 16.4 | 19.9 | 44.8 |
| Kokusou'                         | 1.71 | 0.92 | 14.30 | 11.10 | 460  | 50.1 | 114 | 20.3 | 26.1 | 59.4 | 36.1 |
| Morettiana'                      | 1.32 | 0.91 | 17.70 | 16.90 | 936  | 47.4 | 157 | 15.5 | 14.6 | 13.6 | 28.9 |
| Fruit varieties                  |      |      |       |       |      |      |     |      |      |      |      |
| <i>M. alba</i> (Bulgaria)        | 1.35 | 0.68 | 19.20 | 11.50 | 511  | 44.2 | 121 | 28.7 | 19.8 | 21.8 | 53.7 |
| <i>M. alba</i> × <i>rubra</i>    | 1.29 | 0.60 | 16.00 | 12.60 | 339  | 40   | 120 | 20   | 20.6 | 33.4 | 41.3 |
| <i>M. australis</i>              | 1.50 | 0.74 | 18.40 | 17.60 | 668  | 49.6 | 110 | 20.4 | 21.6 | 15.8 | 57.5 |
| <i>M. nigra</i>                  | 1.07 | 0.46 | 16.70 | 15.10 | 759  | 47.7 | 127 | 25.5 | 11.6 | 18.6 | 77.6 |

**Table S4.** Differences in mean silkworm weight, fresh cocoon weight and silk thread parameters among Slovenian, Hungarian mulberry varieties, reference sericultural varieties and fruit varieties.

| Group name                   | mean<br>silkworm<br>weight<br>5th–7th day<br>5th instar) | Cocoon<br>FW* | silk thread parameters |                   |                   |                   | reeling wastes    |                   |
|------------------------------|----------------------------------------------------------|---------------|------------------------|-------------------|-------------------|-------------------|-------------------|-------------------|
|                              |                                                          |               | length                 | weight            | thickness         | breaks<br>median, | struse            | telette           |
|                              |                                                          |               | m ± sd                 | g ± sd            | denier ± sd       | min, max          | g ± sdg           | g ± sd            |
| Slovenian mulberry genotypes |                                                          |               |                        |                   |                   |                   |                   |                   |
| SE 5                         | 4.34 ± 0.42 a–c                                          | 2.2           | 1411.6 ± 119.8 b–h     | 0.449 ± 0.035 a–e | 2.876 ± 0.259 a–e | 0, 0, 1           | 0.027 ± 0.010 c–d | 0.018 ± 0.004 a–e |
| SE 8                         | 4.61 ± 0.37 a–c                                          | 2.27          | 1417.2 ± 153.1 b–h     | 0.453 ± 0.045 a–e | 2.911 ± 0.446 a–d | 0, 0, 0           | 0.035 ± 0.013 b–d | 0.014 ± 0.006 b–e |
| SM 6                         | 3.87 ± 0.36 a–c                                          | 1.97          | 1324.0 ± 180.6 d–i     | 0.375 ± 0.031 f–i | 2.587 ± 0.379 c–e | 0, 0, 0           | 0.040 ± 0.015 b–d | 0.010 ± 0.004 de  |
| SM 101.1                     | 3.83 ± 0.57 bc                                           | 2.07          | 1439.8 ± 107.4 b–f     | 0.431 ± 0.034 a–g | 2.702 ± 0.219 b–e | 0, 0, 1           | 0.033 ± 0.009 c–d | 0.013 ± 0.003 b–e |
| SM 137                       | 3.82 ± 0.37 bc                                           | 2.11          | 1441.2 ± 80.2 b–f      | 0.407 ± 0.037 c–h | 2.546 ± 0.269 de  | 0, 0, 0           | 0.038 ± 0.011 b–d | 0.017 ± 0.005 a–e |
| SM 214                       | 4.78 ± 0.43 a–c                                          | 2.19          | 1424.3 ± 184.7 b–g     | 0.424 ± 0.042 b–g | 2.690 ± 0.164 b–e | 0, 0, 0           | 0.034 ± 0.012 b–d | 0.018 ± 0.009 a–e |
| SP 12                        | 4.97 ± 0.44 a–c                                          | 2.35          | 1455.3 ± 143.7 b–f     | 0.457 ± 0.031 a–e | 2.849 ± 0.300 a–e | 0, 0, 0           | 0.043 ± 0.014 a–d | 0.029 ± 0.014 a–c |
| SP 256                       | 4.42 ± 0.42 a–c                                          | 2.08          | 1532.3 ± 174.8 ab      | 0.438 ± 0.054 a–f | 2.577 ± 0.162 c–e | 0, 0, 1           | 0.036 ± 0.013 b–d | 0.013 ± 0.009 b–e |
| SP 303                       | 4.17 ± 0.27 a–c                                          | 2.01          | 1437.9 ± 142.6 b–f     | 0.431 ± 0.028 a–g | 2.711 ± 0.171 b–e | 0, 0, 0           | 0.039 ± 0.013 b–d | 0.018 ± 0.012 a–e |
| SP 304                       | 4.57 ± 0.50 a–c                                          | 2.1           | 1307.3 ± 109.6 d–i     | 0.405 ± 0.029 c–h | 2.800 ± 0.256 a–e | 0, 0, 0           | 0.039 ± 0.012 b–d | 0.016 ± 0.004 b–e |
| Hungarian mulberry genotypes |                                                          |               |                        |                   |                   |                   |                   |                   |
| BA 2151                      | 5.17 ± 0.46 a                                            | 2.38          | 1404.0 ± 160.3 b–h     | 0.430 ± 0.051 a–g | 2.776 ± 0.351 a–e | 0, 0, 2           | 0.044 ± 0.019 a–d | 0.021 ± 0.012 a–e |
| BA 2225                      | 4.13 ± 0.38 a–c                                          | 2.1           | 1531.1 ± 228.2 b–i     | 0.487 ± 0.042 a–g | 2.918 ± 0.495 a–e | 0, 0, 2           | 0.019 ± 0.010 a–d | 0.023 ± 0.020 a–e |
| BE 1264.2                    | 4.48 ± 0.35 a–c                                          | 2.26          | 1367.2 ± 189.9 a b–i   | 0.471 ± 0.040 a–c | 3.143 ± 0.428 a   | 0, 0, 0           | 0.026 ± 0.015 c–d | 0.018 ± 0.006 a–e |
| GMS 2286                     | 4.53 ± 0.42 a–c                                          | 2.23          | 1627.0 ± 164.9 ab      | 0.468 ± 0.052 a–d | 2.601 ± 0.261 b–e | 0, 0, 1           | 0.043 ± 0.014 a–d | 0.015 ± 0.010 a–e |
| GMS 2329                     | 4.73 ± 0.28 a–c                                          | 2.38          | 1315.5 ± 106.6 d–i     | 0.433 ± 0.044 a–g | 2.966 ± 0.264 a–c | 0, 0, 1           | 0.054 ± 0.015 a–c | 0.016 ± 0.010 b–e |
| GMS 2532                     | 4.91 ± 0.46 a–c                                          | 2.29          | 1390.3 ± 112.2 b–i     | 0.433 ± 0.052 a–g | 2.806 ± 0.294 a–e | 0, 0, 1           | 0.054 ± 0.021 a–c | 0.027 ± 0.016 a–d |
| GMS 2533                     | 4.54 ± 0.24 a–c                                          | 2.19          | 1331.3 ± 305.4 b–i     | 0.420 ± 0.102 c–g | 2.831 ± 0.356 a–e | 0, 0, 5           | 0.048 ± 0.007 a–d | 0.057 ± 0.076 a   |
| SO 1013                      | 5.11 ± 0.27 ab                                           | 2.45          | 1499.1 ± 174.9 a–d     | 0.494 ± 0.160 a   | 2.973 ± 0.878 a–c | 0, 0, 2           | 0.046 ± 0.020 a–d | 0.014 ± 0.004 a–e |
| SO 1035                      | 4.21 ± 0.24 a–c                                          | 2.23          | 1520.6 ± 262.6 a–c     | 0.462 ± 0.066 a–d | 2.782 ± 0.422 a–e | 0, 0, 0           | 0.032 ± 0.024 c–d | 0.017 ± 0.006 a–e |
| SO 1042                      | 4.54 ± 0.37 a–c                                          | 2.18          | 1412.8 ± 131.9 b–h     | 0.432 ± 0.032 a–g | 2.758 ± 0.130 a–e | 0, 0, 0           | 0.045 ± 0.013 a–d | 0.013 ± 0.006 c–e |

|                                  |                 |      |                    |                   |                   |         |                   |                   |
|----------------------------------|-----------------|------|--------------------|-------------------|-------------------|---------|-------------------|-------------------|
| TO 1131                          | 5.11 ± 0.27 ab  | 2.45 | 1495.8 ± 139.6 a–d | 0.446 ± 0.038 a–b | 2.699 ± 0.294 a–d | 0, 0, 3 | 0.047 ± 0.020 b–d | 0.017 ± 0.005 a–e |
| VE 2706                          | 4.33 ± 0.31 a–c | 2.2  | 1277.0 ± 166.6 f–i | 0.356 ± 0.063 hi  | 2.554 ± 0.597 c–e | 0, 0, 7 | 0.072 ± 0.018 a–c | 0.015 ± 0.005 b–e |
| ZA 1060                          | 3.74 ± 0.29 c   | 2.18 | 1393.8 ± 202.4 b–h | 0.428 ± 0.046 a–g | 2.793 ± 0.343 a–e | 0, 0, 2 | 0.042 ± 0.016 a–d | 0.022 ± 0.008 a–e |
| ZA 1070                          | 5.05 ± 0.29 ab  | 2.3  | 1384.1 ± 143.5 d–i | 0.422 ± 0.040 d–h | 2.766 ± 0.313 a–e | 0, 0, 7 | 0.057 ± 0.027 a–c | 0.027 ± 0.021 a–e |
| ZA 2084                          | 4.44 ± 0.46 a–c | 2.31 | 1383.3 ± 146.6 a–d | 0.420 ± 0.037 a–d | 2.740 ± 0.156 a–e | 0, 0, 1 | 0.038 ± 0.011 c–d | 0.024 ± 0.018 a–e |
| Reference sericultural varieties |                 |      |                    |                   |                   |         |                   |                   |
| 'Florio'                         | 5.08 ± 0.23 ab  | 2.34 | 1312.8 ± 131.3 d–i | 0.439 ± 0.036 a–f | 3.019 ± 0.226 ab  | 0, 0, 1 | 0.051 ± 0.024 a–d | 0.013 ± 0.009 c–e |
| 'Giazzola'                       | 4.56 ± 0.23 a–c | 2.2  | 1267.5 ± 212.9 f–j | 0.402 ± 0.063 d–h | 2.866 ± 0.231 a–e | 0, 0, 7 | 0.045 ± 0.012 a–d | 0.020 ± 0.021 a–e |
| 'Kokusou'                        | 4.75 ± 0.84 a–c | 2.2  | 1401.5 ± 200.2 b–h | 0.429 ± 0.025 a–g | 2.793 ± 0.314 a–e | 0, 0, 1 | 0.039 ± 0.010 b–d | 0.021 ± 0.011 a–e |
| 'Morettiana'                     | 4.71 ± 0.38 a–c | 2.17 | 1335.0 ± 168.3 c–i | 0.411 ± 0.028 c–h | 2.803 ± 0.347 a–e | 0, 0, 1 | 0.042 ± 0.017 a–d | 0.022 ± 0.021 a–e |
| Fruit varieties                  |                 |      |                    |                   |                   |         |                   |                   |
| <i>M. alba</i> (Bulgaria)        | 4.69 ± 0.39 a–c | 2.15 | 1201.8 ± 152.3 ij  | 0.343 ± 0.110 ij  | 2.634 ± 0.885 b–e | 0, 0, 0 | 0.045 ± 0.016 a–d | 0.019 ± 0.012 a–e |
| <i>M. alba</i> × <i>rubra</i>    | 4.19 ± 0.58 a–c | 2.09 | 1242.8 ± 229.8 g–j | 0.370 ± 0.078 g–i | 2.674 ± 0.203 b–e | 0, 0, 1 | 0.053 ± 0.016 a–c | 0.030 ± 0.022 ab  |
| <i>M. australis</i>              | 4.87 ± 0.19 a–c | 2.35 | 1289.8 ± 142.7 e–i | 0.409 ± 0.037 c–h | 2.871 ± 0.279 a–e | 0, 0, 1 | 0.022 ± 0.011 d   | 0.017 ± 0.009 a–e |
| <i>M. nigra</i>                  | 4.93 ± 0.52 a–c | n.d. | –                  | –                 | –                 | –       | –                 | –                 |

\*FW, fresh weight

1

2

**Table S5.** PCA scores of the main PC1 and PC2 axes.

|                            | PC 1     | PC 2     |
|----------------------------|----------|----------|
| 5th C/5th D larval weight  | 0.38958  | 0.26108  |
| 5th C/6th D larval weight  | 0.6744   | 0.077085 |
| 5th C/7th D larval weight  | 0.53864  | 0.040782 |
| cocoon FW                  | 0.29208  | 0.46757  |
| cocoon DW                  | 0.36755  | 0.48416  |
| raw silk length            | -0.60646 | 0.20252  |
| raw silk weight            | -0.2226  | 0.33477  |
| raw silk thickness         | 0.45623  | 0.22308  |
| total proteins             | -0.62196 | 0.23758  |
| total phenolics            | 0.79583  | 0.32608  |
| chlorogenic acid           | 0.5859   | 0.005993 |
| 4-caffeoylquinic acid      | 0.40289  | 0.24664  |
| c-5-coumaroylquinnic a.    | -0.30679 | 0.045554 |
| rutin                      | 0.69188  | 0.07261  |
| quercetin-3-glucoside      | 0.66188  | -0.12959 |
| quercetin malonyl-hexoside | 0.21189  | 0.028206 |
| kaempferol acetyl-hexoside | -0.0156  | -0.02001 |
| P                          | -0.1901  | 0.049048 |
| S                          | -0.24099 | 0.1504   |
| Cl                         | -0.39781 | 0.1778   |
| K                          | 0.088651 | 0.29482  |
| Ca                         | -0.06974 | -0.33728 |
| Mn                         | -0.62261 | 0.36901  |
| Fe                         | -0.30873 | 0.25593  |
| Ni                         | -0.01639 | -0.00892 |
| Zn                         | -0.30134 | 0.16575  |
| Rb                         | 0.11663  | 0.050663 |
| Sr                         | -0.60829 | 0.21218  |
| Eigenvalue                 | 4.74754  | 1.32782  |
| % variance                 | 78.144   | 21.856   |
